# Supplementary material
Source: publisher figshare collection journal article supplement (https://acs.figshare.com/ndownloader/files/22727546)
Supplement: Supplementary file 1 [file 22727546]

# Aminomalononitrile-assisted multifunctional antibacterial coatings

*Tzu-Ying Liao<sup>1,2</sup>, Christopher D. Easton<sup>2</sup>, Helmut Thissen<sup>2,\*</sup>, Wei-Bor Tsai,<sup>1,3\*</sup>*

1. Department of Chemical Engineering, National Taiwan University, No. 1, Sec. 4, Roosevelt Rd., Taipei 106, Taiwan

2. CSIRO Manufacturing, Research Way, Clayton 3168, Victoria, Australia

3. Advanced Research Center for Green Materials Science and Technology, National Taiwan University, 1, Roosevelt Rd., Sec. 4, Taipei 10617, Taiwan

\* Author to whom correspondence should be addressed. *Wei-Bor Tsai:*

*[weibortsai@ntu.edu.tw](mailto:weibortsai@ntu.edu.tw); Helmut Thissen: [helmut.thissen@csiro.au](mailto:helmut.thissen@csiro.au)*

1 Table and 1 Figure in 1 page.

**Table S1.** Average coating thickness of AMN assisted polymer coatings on glass substrates. Values are expressed as the mean  $\pm$  standard error of the mean,  $n = 3$ .

| Sample                                      | Thickness (nm)     |
|---------------------------------------------|--------------------|
| AMN                                         | 21.3 ( $\pm$ 3.5)  |
| AMN-SB <sub>10</sub>                        | 21.6 ( $\pm$ 4.5)  |
| AMN-PEI <sub>15</sub>                       | 29.0 ( $\pm$ 12.1) |
| AMN-PEI <sub>15</sub> -<br>SB <sub>10</sub> | 20.3 ( $\pm$ 5.8)  |

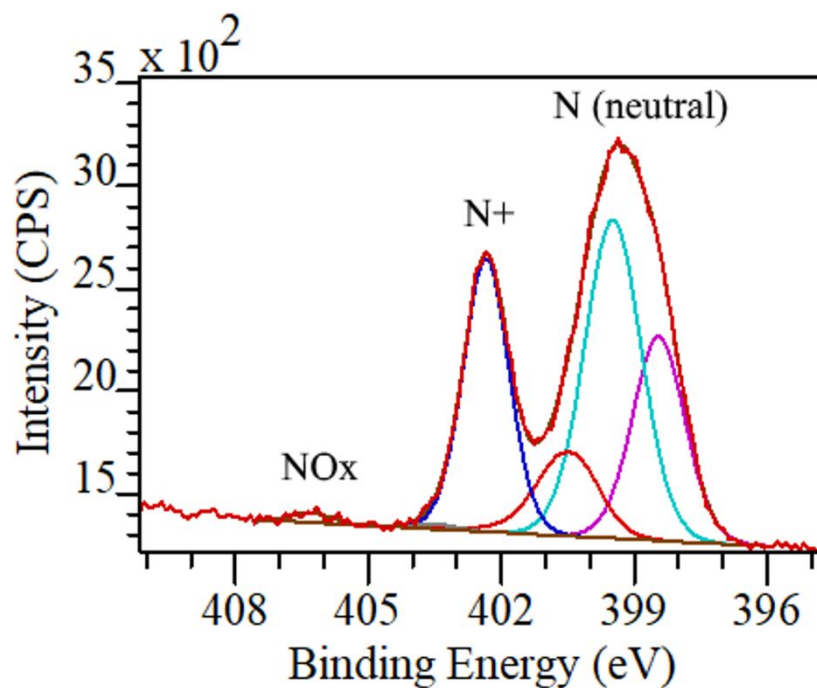

**Figure S1.** Example for an N1s high resolution spectrum fitted with multiple different components, including the components associated with N<sup>+</sup>.
